# Supplementary material
Source: publisher figshare collection journal article supplement (https://asha.figshare.com/articles/dataset/_/28789424)
Supplement: Supplementary file 1 [file 2]

**Supplemental Material S1.** Mean of baseline, intervention phase, and effect size measures.

*a. Mean of baseline and intervention phase and effect size measures of VBI with additional components*

| Outcome measure                                               | Study Id                 | Outcome measures at different time points of assessment |                           |                          |                             | Effect size measures |      |      |
|---------------------------------------------------------------|--------------------------|---------------------------------------------------------|---------------------------|--------------------------|-----------------------------|----------------------|------|------|
|                                                               |                          | Baseline phase (mean)                                   | Intervention phase (mean) | Maintenance phase (mean) | Generalization phase (mean) | PEM                  | PND  | PAND |
| Participant 1 Serving phrase                                  | Bross et al., (2019)     | 15.6                                                    | 95.7                      | -                        | -                           | 1                    | 1    | 1    |
| Participant 1 Total questions asked by participants           | Detar & Vernon (2020)    | 3.25                                                    | 10.75                     | -                        | -                           | 1                    | 1    | 1    |
| Participant 2 Total questions asked by participants           |                          | 2.71                                                    | 8.25                      | -                        | -                           | 1                    | 1    | 1    |
| Participant 3 Total questions asked by participants           |                          | 1.625                                                   | 9.25                      | -                        | -                           | 1                    | 1    | 1    |
| Participant 1 Total questions asked by conversational partner |                          | 35.25                                                   | 16                        | -                        | -                           | 1                    | 1    | 1    |
| Participant 2 Total questions asked by conversational partner |                          | 25.4                                                    | 11.25                     | -                        | -                           | 1                    | 1    | 1    |
| Participant 3 Total questions asked by conversational partner |                          | 13.8                                                    | 8                         | -                        | -                           | 1                    | 1    | 1    |
| Participant 1 Perseverative discussion                        |                          | 50.25                                                   | 20.25                     | -                        | -                           | 1                    | 1    | 1    |
| Participant 2 Perseverative discussion                        |                          | 82.14                                                   | 38.7                      | -                        | -                           | 1                    | 1    | 1    |
| Participant 3 Perseverative discussion                        |                          | 86.3                                                    | 62.5                      | -                        | -                           | 0.5                  | 0.5  | 0.83 |
| Participant 1 Conversational pauses                           |                          | 3                                                       | 1                         | -                        | -                           | 1                    | 1    | 1    |
| Participant 2 Conversational pauses                           |                          | 1.85                                                    | 0                         | -                        | -                           | 1                    | 1    | 1    |
| Participant 3 Conversational pauses                           |                          | 3                                                       | 2.5                       | -                        | -                           | 0.5                  | 0.5  | 0.83 |
| Participant 1 Candyland                                       | Ezzeddine et al., (2020) | 0                                                       | 73.3                      | 90                       | 90                          | 0.91                 | 0.91 | 0.94 |
| Participant 2 Candyland                                       |                          | 0                                                       | 57.5                      | 90                       | 90                          | 0.91                 | 0.91 | 0.94 |
| Participant 1 Memory                                          |                          | 0                                                       | 72.5                      | 90                       | 80                          | 1                    | 1    | 1    |
| Participant 2 Memory                                          |                          | 0                                                       | 58                        | 90                       | 90                          | 1                    | 1    | 1    |
| Participant 3 Memory                                          |                          | 0                                                       | 52.6                      | 90                       | 90                          | 0.93                 | 0.93 | 0.94 |
| Participant 4 Memory                                          |                          | 0                                                       | 70                        | 70                       | 90                          | 0.96                 | 0.96 | 0.96 |

| Outcome measure                                           | Study Id                 | Outcome measures at different time points of assessment |                           |                          |                             | Effect size measures |      |      |
|-----------------------------------------------------------|--------------------------|---------------------------------------------------------|---------------------------|--------------------------|-----------------------------|----------------------|------|------|
|                                                           |                          | Baseline phase (mean)                                   | Intervention phase (mean) | Maintenance phase (mean) | Generalization phase (mean) | PEM                  | PND  | PAND |
| Participant 5 Memory                                      |                          | 0                                                       | 54.7                      | 90                       | 90                          | 0.84                 | 0.84 | 0.87 |
| Participant 6 Memory                                      |                          | 0                                                       | 49.1                      | 90                       | 80                          | 0.75                 | 0.75 | 0.79 |
| Participant 1 Fruit ninja                                 |                          | 0                                                       | 81.8                      | 90                       | 100                         | 1                    | 1    | 1    |
| Participant 2 Fruit ninja                                 |                          | 0                                                       | 64.5                      | 100                      | 100                         | 1                    | 1    | 1    |
| Participant 3 Fruit ninja                                 |                          | 0                                                       | 69                        | 90                       | 90                          | 1                    | 1    | 1    |
| Participant 4 Fruit ninja                                 |                          | 0                                                       | 61.6                      | 90                       | 90                          | 1                    | 1    | 1    |
| Participant 5 Fruit ninja                                 |                          | 0                                                       | 84.1                      | 100                      | 100                         | 1                    | 1    | 1    |
| Participant 6 Fruit ninja                                 |                          | 0                                                       | 80.8                      | 100                      | 90                          | 1                    | 1    | 1    |
| Participant 3 Zingo                                       |                          | 0                                                       | 73.8                      | 90                       | 90                          | 1                    | 1    | 1    |
| Participant 4 Zingo                                       |                          | 0                                                       | 73.8                      | 80                       | 90                          | 1                    | 1    | 1    |
| Participant 5 Zingo                                       |                          | 0                                                       | 68.4                      | 80                       | 80                          | 1                    | 1    | 1    |
| Participant 6 Zingo                                       |                          | 0                                                       | 62.5                      | 80                       | 80                          | 0.96                 | 0.96 | 0.97 |
| Participant 1 Appropriate Interjections                   | Galligan, et al., (2020) | 30                                                      | 80.4                      | -                        | -                           | 0.91                 | 0.91 | 0.93 |
| Participant 1 Missed opportunity to elaborate             | Hurwitz et al., (2019)   | 8.4                                                     | 2.7                       | 1.3                      | -                           | 1                    | 0.33 | 0.66 |
| Participant 2 (missed opportunity to elaborate)           |                          | 4.2                                                     | 1.1                       | 0.6                      | -                           | 0.94                 | 0.9  | 0.93 |
| Participant 4 (Ask personal question)                     |                          | 2.75                                                    | 5.4                       | 7.3                      | -                           | 0.93                 | 0.28 | 0.54 |
| Participant 1 Verbal engagement with games                | Jung, & Sainato (2015)   | 7.5                                                     | 33.3                      | 35                       | -                           | 1                    | 1    | 1    |
| Participant 2 Verbal engagement with games                |                          | 12.1                                                    | 46                        | 70                       | -                           | 1                    | 1    | 1    |
| Participant 3 Verbal engagement with games                |                          | 2.9                                                     | 14                        | 14                       | -                           | 1                    | 1    | 1    |
| Participant 1 Verbal social engagement in the novel games |                          | 15                                                      | 36.3                      | 40                       | -                           | 1                    | 1    | 1    |
| Participant 2 Verbal social engagement in the novel games |                          | 10                                                      | 17.5                      | 42.5                     | -                           | 1                    | 1    | 1    |

Supplemental material, Mohanan et al., “Effectiveness of Video-Based Instruction With Additional Components to Improve Conversational Skills in Autistic Children: A Systematic Review,” *AJSLP*, [https://doi.org/10.1044/2025\\_AJSLP-24-00301](https://doi.org/10.1044/2025_AJSLP-24-00301)

| Outcome measure                                           | Study Id                   | Outcome measures at different time points of assessment |                           |                          |                             | Effect size measures |      |      |
|-----------------------------------------------------------|----------------------------|---------------------------------------------------------|---------------------------|--------------------------|-----------------------------|----------------------|------|------|
|                                                           |                            | Baseline phase (mean)                                   | Intervention phase (mean) | Maintenance phase (mean) | Generalization phase (mean) | PEM                  | PND  | PAND |
| Participant 3 Verbal social engagement in the novel games | Kocaoz, et al., (2019)     | 0                                                       | 2.5                       | 7.5                      | -                           | 1                    | 1    | 1    |
| Participant 1 Initiating/conversation                     |                            | 3                                                       | 93.3                      | 90                       | -                           | 1                    | 1    | 1    |
| Participant 2 Initiating/conversation                     |                            | 3                                                       | 96.6                      | 100                      | -                           | 1                    | 1    | 1    |
| Participant 1 Contingent response                         | Litras et al (2010)        | 6.5                                                     | 63.7                      | 82.5                     | -                           | 0.9                  | 1    | 0.9  |
| Participant 1 Contingent response (generalization)        |                            | 17.5                                                    | 58.2                      | 100                      | -                           | 0.2                  | 1    | 0.85 |
| Participant 5 Latency in social initiation                | Nikopoulos & Keenan (2003) | 300                                                     | 154.6                     | 10                       | 300                         | 0                    | 0.8  | 0.9  |
| Participant 6 Latency in social initiation                |                            | 300                                                     | 164                       | 0                        | 300                         | 0                    | 0.8  | 0.8  |
| Participant 1                                             | Ogilvie & Dieker (2010)    | 1.5                                                     | 4.1                       | -                        | -                           | 0.96                 | 0.96 | 0.97 |
| Participant 2                                             |                            | 2.1                                                     | 3.1                       | -                        | -                           | 0                    | 1    | 0    |
| Participant 3                                             |                            | 1.1                                                     | 1.8                       | -                        | -                           | 0                    | 0.77 | 0    |
| Participant 5 (Initiates comments)                        | Scattone (2007)            | 8.7                                                     | 9.1                       | 19                       | -                           |                      |      |      |
| Participant 1 Extending conversation                      | Stauch et al., (2018)      | 20                                                      | 86.4                      | 95                       | 100                         | 1                    | 1    | 1    |
| Participant 3 Extending conversation                      |                            | 0                                                       | 70                        | 95                       | 100                         | 1                    | 1    | 1    |
| Subject 4 Extending conversation                          |                            | 6.6                                                     | 83.3                      | 100                      | 100                         | 1                    | 1    | 1    |
| Subject 1 Joining conversation                            |                            | 0                                                       | 93.3                      | 80.8                     | 100                         | 1                    | 1    | 1    |
| Subject 3 Joining conversation                            |                            | 0                                                       | 87.1                      | 94.1                     | 0                           | 1                    | 1    | 1    |
| Subject 4 Joining conversation                            |                            | 0                                                       | 91.4                      | 92.8                     | 0                           | 1                    | 1    | 1    |

Supplemental material, Mohanan et al., “Effectiveness of Video-Based Instruction With Additional Components to Improve Conversational Skills in Autistic Children: A Systematic Review,” *AJSLP*, [https://doi.org/10.1044/2025\\_AJSLP-24-00301](https://doi.org/10.1044/2025_AJSLP-24-00301)

| Outcome measure                                 | Study Id                    | Outcome measures at different time points of assessment |                           |                          |                             | Effect size measures |     |      |
|-------------------------------------------------|-----------------------------|---------------------------------------------------------|---------------------------|--------------------------|-----------------------------|----------------------|-----|------|
|                                                 |                             | Baseline phase (mean)                                   | Intervention phase (mean) | Maintenance phase (mean) | Generalization phase (mean) | PEM                  | PND | PAND |
| Participant 2 (Initiates comments)              | Thiemann & Goldstein (2001) | 8                                                       | 15.7                      | 27.5                     | 3.3                         | 0                    | 1   | 0.7  |
| Participant 3 (Initiates comments and requests) |                             | 13.6                                                    | 31                        | 24.4                     | 15                          | 0.5                  | 1   | 0.8  |
| Participant 3 (Contingent responses)            |                             | 14.1                                                    | 18                        | -                        | 17                          | 0                    | 1   | 0    |
| Participant 4 (Initiates comments and requests) |                             | 3                                                       | 15.1                      | 11.6                     | 16                          | 0.9                  | 1   | 0.9  |
| Participant 4 (Contingent responses)            |                             | 4.6                                                     | 25.8                      | 15                       | 9.6                         | 1                    | 1   | 1    |
| Participant 5 (initiate comments)               |                             | 8.5                                                     | 15                        | 17.5                     | -                           | 0                    | 0.7 | 0    |



| Outcome measure                                                    | Study Id | Outcome measures at different time points of assessment |      |                               |      |                               |      |              |      |              |   |              |   |              |   |                          |                             |
|--------------------------------------------------------------------|----------|---------------------------------------------------------|------|-------------------------------|------|-------------------------------|------|--------------|------|--------------|---|--------------|---|--------------|---|--------------------------|-----------------------------|
|                                                                    |          | Baseline phase (mean)                                   |      | Intervention phase - 1 (mean) |      | Intervention phase - 2 (mean) |      | Comparator 1 |      | Comparator 2 |   | Comparator 3 |   | Comparator 4 |   | Maintenance phase (mean) | Generalization phase (mean) |
|                                                                    |          | I                                                       | R    | I                             | R    | I                             | R    | I            | R    | I            | R | I            | R | I            | R |                          |                             |
| Participant 1<br>Play doh –<br>initiations/responses               |          | 9.2                                                     | 2.4  | 22.6                          | 6.7  | -                             | -    | 22.7         | 3.2  | -            | - | -            | - | -            | - | 30                       | 9.3                         |
| Participant 1<br>(chevron cars)-<br>total response<br>score        |          | -                                                       | 13.1 | -                             | 26.3 | -                             | 41   | -            | 14.8 | -            | - | -            | - | -            | - | 44                       | -                           |
| Participant 1<br>(Chevron<br>cars)-<br>Unscripted                  |          | -                                                       | -    | -                             | 14.1 | -                             | 31.4 | -            | 8.4  | -            | - | -            | - | -            | - | 27.3                     | -                           |
| Participant 1<br>(Chevron<br>cars)- scripted                       |          | -                                                       | -    | -                             | 12.1 | -                             | 12.8 | -            | 7.8  | -            | - | -            | - | -            | - | 18.3                     | -                           |
| Participant 1<br>(Chevron cars)<br>- prompted                      |          | -                                                       | -    | -                             | -    | -                             | 8.8  | -            | -    | -            | - | -            | - | -            | - | -                        | -                           |
| Participant 1<br>(Chevron cars)<br>–<br>initiations/responses      |          | 9.1                                                     | 3.4  | 18.6                          | 6    | 28.2                          | 8.7  | 10.2         | 4.2  | -            | - | -            | - | -            | - | 30                       | 9.3                         |
| Participant 1<br>(Caillou’s tree<br>house)-total<br>response score |          | -                                                       | 14.8 | -                             | -    | -                             | -    | -            | 48.5 | -            | - | -            | - | -            | - | -                        | 49.3                        |
| Participant 1<br>(Caillou’s tree<br>house)-<br>Unscripted          |          | -                                                       | -    | -                             | -    | -                             | -    | -            | 34.5 | -            | - | -            | - | -            | - | -                        | 28.3                        |

Supplemental material, Mohanan et al., "Effectiveness of Video-Based Instruction With Additional Components to Improve Conversational Skills in Autistic Children: A Systematic Review," *AJSLP*, [https://doi.org/10.1044/2025\\_AJSLP-24-00301](https://doi.org/10.1044/2025_AJSLP-24-00301)

[illegible]

| Outcome measure                 | Study Id | Outcome measures at different time points of assessment |      |                                |      |                                |      |                |   |               |   |               |   |               |   |                           |                              |
|---------------------------------|----------|---------------------------------------------------------|------|--------------------------------|------|--------------------------------|------|----------------|---|---------------|---|---------------|---|---------------|---|---------------------------|------------------------------|
|                                 |          | Baseline phase (mean)                                   |      | Interventi on phase - 1 (mean) |      | Interventi on phase – 2 (mean) |      | Com parat or 1 |   | Compara tor 2 |   | Compar ator 3 |   | Compara tor 4 |   | Maintenan ce phase (mean) | Generalizati on phase (mean) |
|                                 |          | I                                                       | R    | I                              | R    | I                              | R    | I              | R | I             | R | I             | R | I             | R |                           |                              |
| Participant 1 (Target)          |          | -                                                       | 2.8  | -                              | 51.8 | -                              | 30   | -              | - | -             | - | -             | - | -             | - | 83.7                      | -                            |
| Participant 1 (Generalizatio n) |          | -                                                       | 4.3  | -                              | -    | -                              | 6.2  | -              | - | -             | - | -             | - | -             | - | -                         | -                            |
| Participant 2 (peer comparison) |          | -                                                       | 81.7 | -                              | 83.2 | -                              | 80   | -              | - | -             | - | -             | - | -             | - | 83                        | -                            |
| Participant 2 (Target)          |          | -                                                       | 4.9  | -                              | 61.7 | -                              | 21   | -              | - | -             | - | -             | - | -             | - | 48.5                      | -                            |
| Participant 2 (Generalizatio n) |          | -                                                       | 2.7  | -                              | -    | -                              | 4    | -              | - | -             | - | -             | - | -             | - | -                         | -                            |
| Participant 3 (peer comparison) |          | -                                                       | 92.2 | -                              | -    |                                | 91.2 | -              | - | -             | - | -             | - | -             | - | 94.2                      | -                            |
| Participant 3 (Target)          |          | -                                                       | 7.2  | -                              | -    |                                | 55.6 | -              | - | -             | - | -             | - | -             | - | 82                        | -                            |
| Participant 3 (Generalizatio n) |          | -                                                       | 24   | -                              | -    |                                | 27.2 | -              | - | -             | - | -             | - | -             | - | -                         | -                            |

Note. Intervention phase 1- Video modeling + reinforcement, Intervention phase 2 – Video modeling + self management teaching phase, Comparator 1 – Video modeling alone, Comparator 2 – Reinforcement, Comparator 3 – Self management, Comparator 4 – electronic activity Schedule, I- initiation, R- response



c. *Effect size measures of conversational skills comparing VBI with additional components Vs intervention strategies*

[illegible]

| Outcome                                     | Study ID            | PND interve<br>ntion1 |        | PND comp<br>arato<br>r 1 |      | PND comp<br>arato<br>r 2 |   | PND comp<br>arato<br>r 3 |   | PND comp<br>arato<br>r 4 |   | PEM interve<br>ntion1 |      | PEM compa<br>rator 1 |      | PEM comp<br>arato<br>r 2 |   | PEM comp<br>arato<br>r 3 |   | PEM comp<br>arator 4 |   | PAND interve<br>ntion1 |      | PAND compar<br>ator 1 |      | PAND compara<br>tor 2 |   | PAND compara<br>tor 3 |   | PAND Comp<br>arator 4 |   |
|---------------------------------------------|---------------------|-----------------------|--------|--------------------------|------|--------------------------|---|--------------------------|---|--------------------------|---|-----------------------|------|----------------------|------|--------------------------|---|--------------------------|---|----------------------|---|------------------------|------|-----------------------|------|-----------------------|---|-----------------------|---|-----------------------|---|
|                                             |                     | I                     | R      | I                        | R    | I                        | R | I                        | R | I                        | R | I                     | R    | I                    | R    | I                        | R | I                        | R | I                    | R | I                      | R    | I                     | R    | I                     | R | I                     | R | I                     | R |
| Participant 2 (Target)                      |                     | -                     | 56.8 % | -                        | 57 % | -                        | - | -                        | - | -                        | - | -                     | 1    | -                    | 0.71 | -                        | - | -                        | - | -                    | - | 1                      | -    | 0.85                  | -    | -                     | - | -                     | - | -                     | - |
| Participant 2 (Generalization)              |                     | -                     | -      | -                        | -    | -                        | - | -                        | - | -                        | - | -                     | -    | -                    | -    | -                        | - | -                        | - | -                    | - | -                      | -    | -                     | -    | -                     | - | -                     | - | -                     | - |
| Participant 3 (peer comparison)             |                     | -                     | -      | -                        | -    | -                        | - | -                        | - | -                        | - | -                     | -    | -                    | -    | -                        | - | -                        | - | -                    | - | -                      | -    | -                     | -    | -                     | - | -                     | - | -                     | - |
| Participant 3 (Target)                      |                     | -                     | -      | -                        | 88 % | -                        | - | -                        | - | -                        | - | -                     | -    | -                    | -    | -                        | - | -                        | - | -                    | - | -                      | 0.73 | -                     | -    | -                     | - | -                     | - | -                     | - |
| Participant 3 (Generalization)              |                     | -                     | -      | -                        | -    | -                        | - | -                        | - | -                        | - | -                     | -    | -                    | -    | -                        | - | -                        | - | -                    | - | -                      | -    | -                     | -    | -                     | - | -                     | - | -                     | - |
| Participant 1 (showing an item to the peer) | Osos et al., (2020) | -                     | 1      | -                        | 0.5  | -                        | - | -                        | - | -                        | - | -                     | 1    | -                    | 0.5  | -                        | - | -                        | - | -                    | - | -                      | 1    | -                     | 0.77 | -                     | - | -                     | - | -                     | - |
| Participant 2 (showing an item to the peer) |                     | -                     | 0.91   | -                        | 0.91 | -                        | - | -                        | - | -                        | - | -                     | 0.91 | -                    | 0.91 | -                        | - | -                        | - | -                    | - | -                      | 0.94 | -                     | 0.94 | -                     | - | -                     | - | -                     | - |
| Participant 3 (showing an item to the peer) |                     | -                     | 1      | -                        | 1    | -                        | - | -                        | - | -                        | - | -                     | 1    | -                    | 1    | -                        | - | -                        | - | -                    | - | -                      | 1    | -                     | 1    | -                     | - | -                     | - | -                     | - |

[illegible]

| Outcome                                           | Study ID | PND interve ntion1  |      | PND comp arator 1 |   | PND comp arator 2 |   | PND comp arator 3 |   | PND comp arator 4 |   | PEM interv ention 1 |      | PEM compa rator 1 |   | PEM comp arator 2 |   | PEM comp arator 3 |   | PEM comp arator 4 |   | PAND interve ntion1  |      | PAND compar ator 1 |   | PAND compara tor 2 |   | PAND compara tor 3 |   | PAND Comp arator 4 |   |   |
|---------------------------------------------------|----------|---------------------|------|-------------------|---|-------------------|---|-------------------|---|-------------------|---|---------------------|------|-------------------|---|-------------------|---|-------------------|---|-------------------|---|----------------------|------|--------------------|---|--------------------|---|--------------------|---|--------------------|---|---|
|                                                   |          | PND interve ntion 2 |      |                   |   |                   |   |                   |   |                   |   | PEM interv ention 2 |      |                   |   |                   |   |                   |   |                   |   | PAND interve ntion 2 |      |                    |   |                    |   |                    |   |                    |   |   |
| Participant 1 Play doh - prompted                 |          | I                   | R    | I                 | R | I                 | R | I                 | R | I                 | R | I                   | R    | I                 | R | I                 | R | I                 | R | I                 | R | I                    | R    | I                  | R | I                  | R | I                  | R | I                  | R |   |
|                                                   |          | -                   | -    | -                 | - | -                 | - | -                 | - | -                 | - | -                   | -    | -                 | - | -                 | - | -                 | - | -                 | - | -                    | -    | -                  | - | -                  | - | -                  | - | -                  | - |   |
| Participant 1 Play doh – initiations/r esponses   |          | -                   | -    | -                 | - | -                 | - | -                 | - | -                 | - | -                   | -    | -                 | - | -                 | - | -                 | - | -                 | - | -                    | -    | -                  | - | -                  | - | -                  | - | -                  | - |   |
| Participant 1 (chevron cars)-total response score |          | -                   | 0.23 |                   | 0 | -                 | - | -                 | - | -                 | - | -                   | 0.50 | -                 | 0 | -                 | - | -                 | - | -                 | - | -                    | 0.5  | -                  | 0 | -                  | - | -                  | - | -                  | - | - |
|                                                   |          |                     | 1    |                   |   | -                 | - | -                 | - | -                 | - | -                   | 1    | -                 |   | -                 | - | -                 | - | -                 | - | -                    | 1    | -                  |   | -                  | - | -                  | - | -                  | - | - |
| Participant 1 (Chevron cars)- Unscripted          |          | -                   | 0    |                   | 0 | -                 | - | -                 | - | -                 | - | -                   | 0    | -                 | 0 | -                 | - | -                 | - | -                 | - | -                    | 0.66 | -                  | 0 | -                  | - | -                  | - | -                  | - | - |
|                                                   |          |                     | 1    |                   |   |                   |   |                   |   |                   |   |                     | 1    |                   |   |                   |   |                   |   |                   |   |                      | 1    |                    |   |                    |   |                    |   |                    |   |   |
| Participant 1 (Chevron cars)- Scripted            | -        | 0                   |      | 0                 | - | -                 | - | -                 | - | -                 | - | 0.1                 | -    | 0                 | - | -                 | - | -                 | - | -                 | - | 0.33                 | -    | 0                  | - | -                  | - | -                  | - | -                  | - |   |
|                                                   |          | 0                   |      |                   |   |                   |   |                   |   |                   |   | 0                   |      |                   |   |                   |   |                   |   |                   |   | 0                    |      |                    |   |                    |   |                    |   |                    |   |   |
| Participant 1 (Chevron cars) – prompted           |          | -                   | 0    |                   |   | -                 | - | -                 | - | -                 | - | -                   | -    |                   | - | -                 | - | -                 | - | -                 | - | 0                    | -    | -                  | - | -                  | - | -                  | - | -                  | - |   |



| Outcome                                                           | Study ID | PND intervention1  |   | PND comparator 1 |   | PND comparator 2 |   | PND comparator 3 |   | PND comparator 4 |   | PEM intervention 1 |   | PEM comparator 1 |   | PEM comparator 2 |   | PEM comparator 3 |   | PEM comparator 4 |   | PAND intervention1  |   | PAND comparator 1 |   | PAND comparator 2 |   | PAND comparator 3 |   | PAND Comparator 4 |   |
|-------------------------------------------------------------------|----------|--------------------|---|------------------|---|------------------|---|------------------|---|------------------|---|--------------------|---|------------------|---|------------------|---|------------------|---|------------------|---|---------------------|---|-------------------|---|-------------------|---|-------------------|---|-------------------|---|
|                                                                   |          | PND intervention 2 |   |                  |   |                  |   |                  |   |                  |   | PEM intervention 2 |   |                  |   |                  |   |                  |   |                  |   | PAND intervention 2 |   |                   |   |                   |   |                   |   |                   |   |
| Participant 1<br>(Caillou's tree house)–<br>initiations/responses |          | I                  | R | I                | R | I                | R | I                | R | I                | R | I                  | R | I                | R | I                | R | I                | R | I                | R | I                   | R | I                 | R | I                 | R | I                 | R | I                 | R |
|                                                                   |          | -                  | - | -                | - | -                | - | -                | - | -                | - | -                  | - | -                | - | -                | - | -                | - | -                | - | -                   | - | -                 | - | -                 | - | -                 | - | -                 | - |

Note. Intervention phase 1- Video modeling + reinforcement, Intervention phase 2 – Video modeling + self management teaching phase, Comparator 1 – Video modeling, Comparator 2 – Reinforcement, Comparator 3 – Self management, Comparator 4 – electronic activity Schedule, I- initiation, R- response
